# Supplementary material for: Facile efficient earth abundant NiO/C composite electrocatalyst for the oxygen evolution reaction
Source: Royal Society of Chemistry journal article supplement (doi:10.1039/c8ra10472g), 2019-01-01
Supplement: c8ra10472g1.pdf [file c8ra10472g1.pdf]

## Supplementary data

### S1. XRD spectra of carbon obtained from the dehydration sucrose sugar

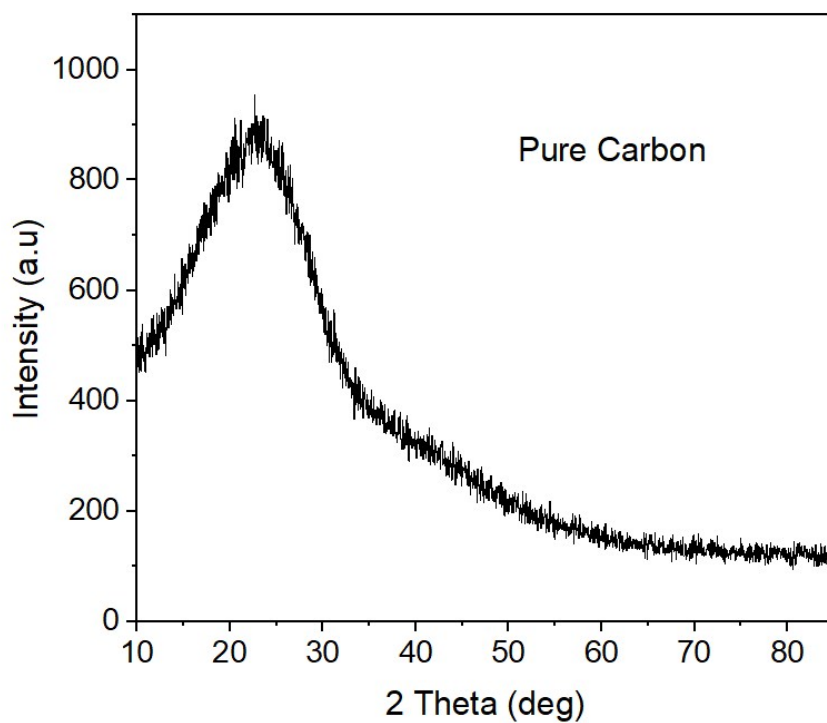

S2: EDS analysis a. sample 1. b, sample 2. d, sample 3. c, sample 4 NiO/Ccomposites respectively

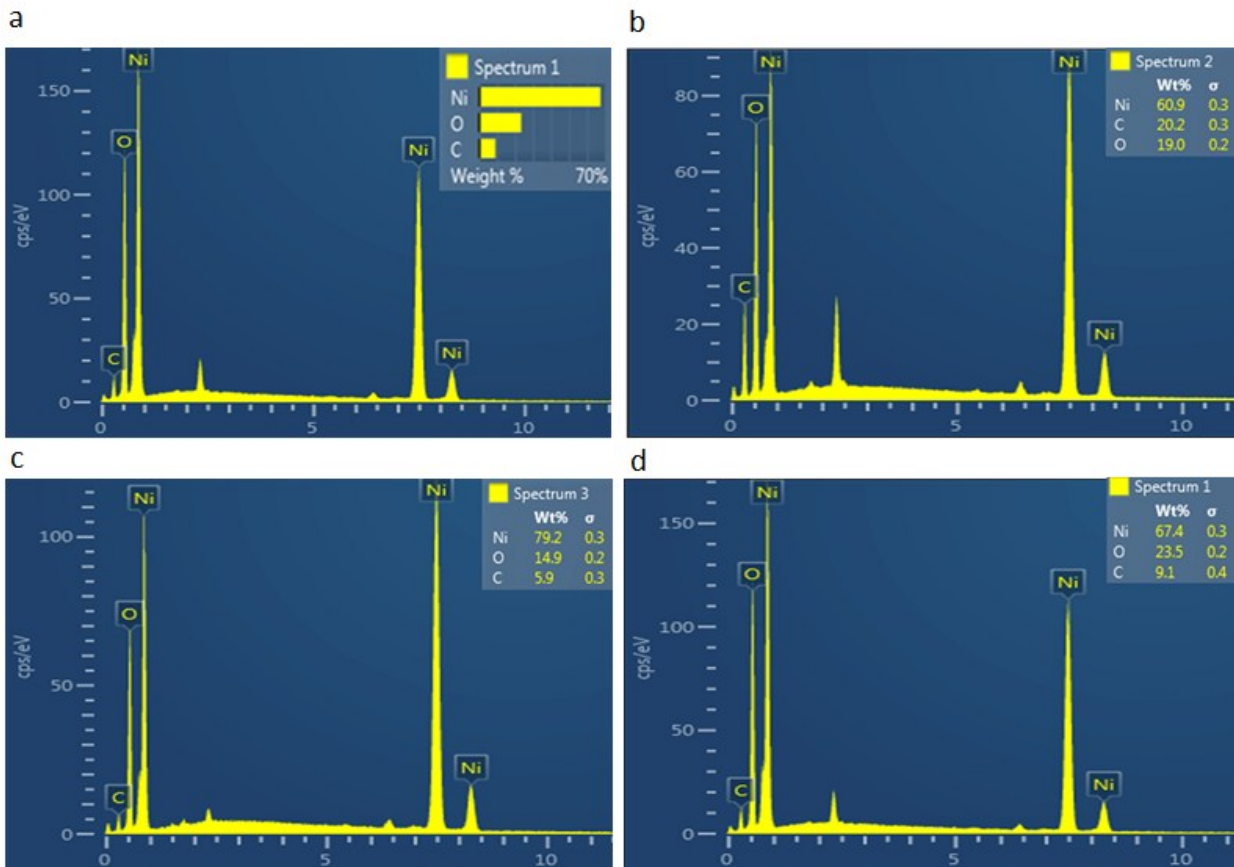

**Table S1.** The comparison of the proposed NiO/C electrocatalyst with the reported Ni-based electrocatalysts

| Catalyst                                                                                          | Electrolyte | Tafel slope<br>mVdec <sup>-1</sup> | Overpotential<br>@ 10 mA/cm <sup>2</sup> | References |
|---------------------------------------------------------------------------------------------------|-------------|------------------------------------|------------------------------------------|------------|
| NiCo <sub>2</sub> O <sub>4</sub> nanosponge                                                       | 0.1 M KOH   | 64.4                               | 1.592                                    | 48         |
| NiCo <sub>2</sub> O <sub>4</sub> nanosheet decorated on CNT                                       | 1MKOH       | 68.1                               | 1.62                                     | 49         |
| CPF/NiCo <sub>2</sub> O <sub>4</sub> (porous nanowire)/Co <sub>0.57</sub> Ni <sub>0.43</sub> LMOs | 0.1 M KOH   | 63                                 | 1.57                                     | 50         |
| CPF/NiCo <sub>2</sub> O <sub>4</sub>                                                              | 0.1 M KOH   | 123                                | 1.78                                     | 50         |
| NiCo <sub>2</sub> O <sub>4</sub> /r-GO                                                            | 0.1 M KOH   | 63                                 | 1.62                                     | 51         |
| Au-NiCo <sub>2</sub> O <sub>4</sub> on 3D graphene like material                                  | 0.1 M KOH   |                                    | 0.7 Vvs SCE for 9.1 mA/cm <sup>2</sup>   | 52         |
| NiCo <sub>2</sub> O <sub>4</sub> hollow microcuboids                                              | 1M NaOH     | 53                                 | 1.52                                     | 53         |
| Mesoporous NiCo <sub>2</sub> O <sub>4</sub> nanocages                                             | 0.1 M KOH   | 75                                 | 1.57                                     | 54         |
| NiCo <sub>2</sub> O <sub>4</sub> /NiO Sheets                                                      | 1 M NaOH    | 61                                 | 1.59                                     | 55         |
| NiO/C                                                                                             | 1M KOH      | 55                                 | 1.45                                     | This work  |
